# Supplementary material
Source: Royal Society of Chemistry journal article supplement (https://www.rsc.org/suppdata/cc/1998/1105/H802315.doc)
Supplement: Supplementary file 1 [file H802315.doc]

**Supplementary Material**

**Experimental Details**

**Instrumentation and Materials.** All the instrumental details and the standard materials are identical to those reported in our previous publications.[[1]](#footnote-2)The preparation of the *trans*-dihalogeno-osmium(IV) complexes of tetramesityl­porphyrin— (TMP)Os(Cl)2, (TMP)Os(Br)2, (TMP)Os(I)2— and tetra(*p*-tolyl)porphyrin— (TTP)Os(Cl)2, (TTP)Os(Br)2, (TTP)Os(I)2— is also described therein.

**[(OEP)Os(IV)] Complexes.** The octaethyl­porphyrin complexes (OEP)Os(Cl)2, (OEP)Os(Br)2, and (OEP)Os(I)2 were obtained by heating (OEP)(Os)(CO) (10 mg, 13 mol) with either CCl4 (10 mL, 12 h), or CBr4 (40 mg, 120 mol, 12 h, in 10 mL benzene), or I2 (20 mg, 80 mol, 30 min, in 10 mL benzene), followed by solvent evaporation and chromatographic purification (not required for (OEP)Os(I)2) by silica (elution by CH2Cl2/hexanes) and recrystallization from CH2Cl2/hexanes in 30, 59, and 92% yield, respectively.

**[(TMP)Ru(IV)] Complexes.** The sterically protected ruthenium(IV) porphyrins (TMP)Ru(Cl)2, (TMP)Ru(Br)2, and (TMP)Ru(I)2 were prepared from (TMP)Ru(CO) in complete analogy to the already reported tetra-(2,6-dimethylphenyl)porphyrin complexes.1a 1H NMR examinations of the crude reaction mixtures revealed only traces of unreacted (TMP)Ru(CO). Recrystallization from toluene/n-heptane afforded the products in nearly quantitative yields.

**[(TTP)Ru(IV)] and [(OEP)Ru(IV)] Complexes.** In the analogous reactions of (TTP)Ru(CO) and (OEP)Ru(CO) with CCl4, CBr4, and I2, the requested complexes— (TTP)Ru(Cl)2, (TTP)Ru(Br)2, (TTP)Ru(I)2, (OEP)Ru(Cl)2, (OEP)Ru(Br)2, and (OEP)Ru(I)2— were obtained in 30-60% yields. The rest of the material was dimeric, with NMR spectra very similar to that of the -oxo-Ru(IV) dimers ([(POR)(RO)Ru]2O, R = alkyl, aryl), reported by Collman *et al*.[[2]](#footnote-3) Chromatographic methods (silica, alumina, florisil) were found not to be adequate for separation of the monomeric products, because of the substitution lability of the Ru(IV)-halogeno bonds. Only traces of starting material and some of the original dimeric products were eluted with CH2Cl2, while most of the material remained at the top of the column and could only be released with alcohols. This is emphasized for both the sterically protected TMP and the non sterically protected OEP derivatives. Utilization of isopropanol as eluent for a 1:1 mixture of (OEP)Ru(Cl)2 and [(OEP)(Cl)Ru]2O resulted in a mixture of [(OEP)(RO)Ru]2O complexes (R = CH(CH3)2, H), without any monomeric porphyrin. Similarly, chromatographic treatment of pure (TMP)Ru(Cl)2— which is sterically protected against dimerization— with isopropanol resulted in its complete transformation into a mixture of (TMP)Ru(OR)2 complexes (R = CH(CH3), H), identical to those reported by James and coworkers.[[3]](#footnote-4)

**1H NMR Spectra of the Complexes.** The 1H NMR spectra of all complexes were examined in CDCl3 at 23˚C. The chemical shifts of all protons are summarized in Tables S1 - S4, together with that of the appropriate *trans*-dioxometal(VI) porphyrin.

**X-ray Crystallographic Analysis of (TMP)Os(I)2.** Crystals suitable for X-ray structure determination were obtained by slow vapor diffusion of n-hexane in a CHCl3 solution of (TMP)Os(I)2 at room temperature. Data were measured on a PW1100/20 Philips Four-Circle Computer-Controlled Diffractometer. Mo K ­(= 0.71069Å) radiation with a graphite crystal monochromator in the incident beam was used. The unit cell dimensions were obtained by a least-squares fit of 24 centered reflections in the range of 11 ≤ ≤ 15˚. Intensity data were collected using the -2 technique to a maximum 2 of 46˚. The scan width, , for each reflection was 1.00 + 0.35.tan with a scan speed of 3.0 deg/min. Background measurements were made for a total of 10 seconds at both limits of each scan. Three standard reflections were monitored every 60 minutes. No systematic variations in intensities were found. Intensities were corrected for Lorentz, polarization, and absorption effects. All non-hydrogen atoms were found by using the results of the SHELXS-86 direct method analysis.[[4]](#footnote-5) After several cycles of refinements,[[5]](#footnote-6) the positions of the hydrogen atoms were calculated and added to the refinement process. A final difference Fourier synthesis map showed several peaks less than 2.6 e/Å3 scattered about the unit cell without a significant feature. The discrepancy indices, R=Ω|F0|-|Fc|Ω/|F0| and Rw=[w(|F0|-|Fc|)2/w|F0|2]1/2 are presented with other pertinent crystallographic data in Table 1, and selected bond lengths are given in Table 2. An ORTEP view of (TMP)Os(I)2 is provided as Figure S1.

**Table S1.** 1H NMR chemical shifts (, ppm, CDCl3, 23 ˚C) and isotropic shifts (, ppm)a for the diamagnetic dioxoosmium(VI) and the paramagnetic dihaloosmium(IV) and other similar complexes of tetraarylporphyrins.

|  | *pyrrole*-H | | *ortho*-CH3 | | *meta*-H | | *para*-CH3 | |
| --- | --- | --- | --- | --- | --- | --- | --- | --- |
|  |  | a |  | a |  | a |  | a |
| (TMP)Os(O)2 | 8.86 | --- | 1.89 | --- | 7.31 | --- | 2.64 | --- |
| (TMP)Os(Cl)2 | -5.13 | -13.99 | 2.68 | 0.79 | 8.21 | 0.90 | 3.31 | 0.67 |
| (TMP)Os(Br)2 | -4.44 | -13.30 | 2.70 | 0.81 | 8.21 | 0.90 | 3.28 | 0.64 |
| (TMP)Os(I)2 | -3.16 | -12.02 | 2.80 | 0.91 | 8.25 | 0.94 | 3.24 | 0.60 |
|  |  |  |  |  |  |  |  |  |
|  | *pyrrole*-H | | *ortho*-H | | *meta*-H | | *para*-CH3 | |
| (TTP)Os(O)2 | 9.14 | --- | 8.23 | --- | 7.72 | --- | 2.73 | --- |
| (TTP)Os(Cl)2 | -5.23 | -14.37 | 10.89 | 2.66 | 8.68 | 0.96 | 3.41 | 0.68 |
| (TTP)Os(Br)2 | -4.42 | -13.56 | 10.65 | 2.42 | 8.64 | 0.92 | 3.39 | 0.66 |
| (TTP)Os(I)2 | -2.88 | -12.02 | 10.30 | 2.07 | 8.58 | 0.86 | 3.37 | 0.64 |
| (TTP)Os(OEt)2 | 4.75 | -4.39 | 9.14 | 0.91 | 7.95 | 0.23 | 2.93 | 0.20 |

a isotropic shifts, the difference between identical protons in the paramagnetic Os(IV) complexes and the diamagnetic Os(VI) porphyrins.

**Table S2.** 1H NMR chemical shifts (, ppm) and isotropic shifts (, ppm)a for the diamagnetic dioxoosmium(VI) and the paramagnetic dihaloosmium(IV) and other similar complexes of octaethylporphyrin.

|  | *pyrrole*-CH2 | | *pyrrole*-CH3 | | *meso*-H | |
| --- | --- | --- | --- | --- | --- | --- |
|  |  | a |  | a |  | a |
| (OEP)Os(O)2 | 4.25 | --- | 2.13 | --- | 10.75 | --- |
| (OEP)Os(Cl)2 | 19.43 | 15.18 | 4.40 | 2.27 | 22.48 | 11.73 |
| (OEP)Os(Br)2 | 19.33 | 15.08 | 4.34 | 2.21 | 21.97 | 11.22 |
| (OEP)Os(I)2 | 18.80 | 14.55 | 4.18 | 2.05 | 21.15 | 10.40 |
| (OEP)Os(OPh)2 | 12.40 | 8.15 | 3.45 | 1.32 | 19.17 | 8.42 |
| (OEP)Os(OEt)2 | 8.23 | 3.98 | 2.82 | 0.69 | 15.22 | 4.47 |

a See Table S1.

**Table S3.** 1H NMR chemical shifts (, ppm) and isotropic shifts (, ppm)a for the diamagnetic dioxoruthenium(VI) and the paramagnetic dihaloruthenium(IV) and other similar complexes of tetraarylporphyrins.

|  | *pyrrole*-H | | *ortho*-CH3 | | *meta*-H | | *para*-CH3 | |
| --- | --- | --- | --- | --- | --- | --- | --- | --- |
|  |  | a |  | a |  | a |  | a |
| (TMP)Ru(O)2 | 8.65 | --- | 1.83 | --- | 7.23 | --- | 2.59 | --- |
| (TMP)Ru(Cl)2 | -55.15 | -63.8 | 4.16 | 2.33 | 12.5 | 5.27 | 4.08 | 1.49 |
| (TMP)Ru(Br)2 | -45.1 | -53.75 | 4.57 | 2.74 | 14.98 | 7.75 | 4.20 | 1.61 |
| (TMP)Ru(I)2 | -23.9 | -32.55 | 4.47 | 2.64 | 17.65 | 10.33 | 4.12 | 1.53 |
| (TMP)Ru(OR)2b | -11.95 | -20.6 | 2.90 | 1.07 | 7.52 | 0.29 | 2.85 | 0.26 |
|  |  | |  | |  | |  | |
|  | *pyrrole*-H | | *ortho*-H | | *meta*-H | | *para*-H | |
| (TPP)Ru(O)2c | 9.1 | --- | 8.7 | --- | 8.1 | --- | 8.1 | --- |
| (TPP)Ru(Cl)2d | -57.72 | -66.82 | 7.10 | -1.6 | 11.52 | 3.42 | 6.60 | -1.5 |
| (TPP)Ru(Br)2d | -47.95 | -57.05 | 5.21 | -3.49 | 12.75 | 4.65 | 5.82 | -2.28 |
| (TPP)Ru(I)2d | -23.10 | -32.2 | 4.64 | -4.06 | 12.37 | 4.27 | 6.14 | -1.96 |

a See Table S1. b Reference 3a, in benzene-*d6*. c W.-H. Leung and C.-M. Che, *J. Am. Chem. Soc.*, 1989, **111**, 8812. d M. Ke, C. Sishta, B. R. James, D. Dolphin, J. W. Sparapany and J. A. Ibers, *Inorg. Chem.*, 1991, **30**, 4766.

**Table S4.** 1H NMR chemical shifts (, ppm) and isotropic shifts (, ppm)a for the diamagnetic dioxoruthenium(VI) and the paramagnetic dihaloruthenium(IV) complexes of octaethylporphyrin.

|  | *pyrrole*-CH2 | | *pyrrole*-CH3 | | *meso*-H | |
| --- | --- | --- | --- | --- | --- | --- |
|  |  | a |  | a |  | a |
| (OEP)Ru(O)2b | 4.25 | --- | 2.05 | --- | 10.58 | --- |
| (OEP)Ru(F)2c | --- | --- | --- | --- | 9.63 | -0.95 |
| (OEP)Ru(Cl)2 | 59.71 | 55.46 | 6.71 | 4.66 | 8.17c,d | -2.41 |
| (OEP)Ru(Br)2c | 60.1 | 55.58 | 7.10 | 5.05 | 3.50 | -7.08 |
| (OEP)Ru(I)2 | 58.37 | 54.12 | 7.23 | 5.18 | -18.03 | -28.61 |
|  |  |  |  |  |  |  |

a See Table S1. b See footnote c in Table S3. c C. Sishta, M. Ke, B. R. James, D. Dolphin, *J. Chem. Soc., Chem. Commun.*, 1986, 787. d A value of 8.89 ( = -1.69) ppm was reported by Sishta *et al*.

1. (?) (a) Z. Gross and C. M. Barzilay, *J. Chem. Soc., Chem. Commun.*, 1995, 1287. (b) Z. Gross and A. Mahammed, *Inorg. Chem.*, 1996, **35**, 7260. [↑](#footnote-ref-2)
2. (?) J. P. Collman, C. E. Barnes, P. J. Brothers, T. J. Collins, T. Ozawa, J. C. Gallucci and J. A. Ibers, *J. Am. Chem. Soc.*, 1984, **106**, 5151. [↑](#footnote-ref-3)
3. (?) (a) S. Y. S. Cheng, N. Rajapakse, S. J. Rettig and B. R. James, *J. Chem. Soc., Chem. Commun.*, 1994, 2669. (b) N. Rajapakse, B. R. James and D. Dolphin, *Stud. Surf. Sci. Catal.*, 1990, **55**, 109. [↑](#footnote-ref-4)
4. (?) G. M. Sheldrick, *Crystallographic Computing 3*; Oxford University Press: Oxford, 1985; pp 175-189. [↑](#footnote-ref-5)
5. (?) All crystallographic computing was done on a VAX9000 computer at the Hebrew University of Jerusalem, using the TEXAN Structure Analysis Software, by Dr. S. Cohen whose assistance we acknowledge. [↑](#footnote-ref-6)
